# Supplementary material for: Cardiomyocyte proliferation and heart regeneration in adult Xenopus tropicalis evidenced by a transgenic reporter line
Source: PubMed Central journal article supplement — NPJ Regen Med. 2024 Dec 19;9:40. doi: 10.1038/s41536-024-00384-w (PMC11659404; doi:10.1038/s41536-024-00384-w), 2024-12-19
Supplement: 41536_2024_384_MOESM1_ESM.pdf [file 41536_2024_384_MOESM1_ESM.pdf]

## Supplementary Material

### **Cardiomyocyte proliferation and heart regeneration in adult *Xenopus tropicalis* evidenced by a transgenic reporter line**

Xiao-Lin Lin, Jin-Hua Lin, Yan Cao, Han Zhang, Si-Yi He, Hai-Yan Wu, Ze-Bing Ye, Li Zheng, Xu-Feng Qi

Supplementary figures 1-4

Supplementary table 1

Supplementary video legends 1-2

## Supplementary figure and legend

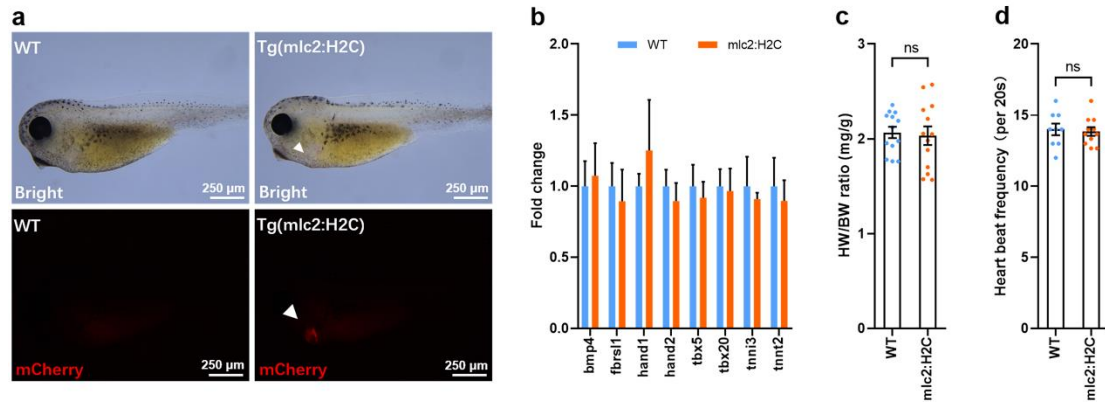

**Supplementary Figure 1. Effects of reporter gene on heart development and function in transgenic reporter line *Tg(mlc2:H2C)*.** **a** Whole-mount bright-field (upper) and epifluorescence (lower) images showing mCherry expression in Wild-type (WT, left) and F1 *Tg(mlc2:H2C)* (right) tadpoles. Arrows indicate heart expressing mCherry. **b** qPCR validation of heart development-related genes in WT and *Tg(mlc2:H2C)* tadpoles. Data are presented as mean  $\pm$  SEM ( $n = 4$  independent experiments). Ns, no significant difference (one-way ANOVA test). **c** Quantification of HW/BW ratio in adult frogs. Data are presented as mean  $\pm$  SEM ( $n = 13$  frogs). Ns, no significant difference (Student's *t* test). **d** Quantification of cardiac systolic function in adult frogs. Data are presented as mean  $\pm$  SEM ( $n = 9 \sim 11$  frogs). Ns, no significant difference (Student's *t* test). This figure was created by Photoshop Image 12 software using our own data in the work.

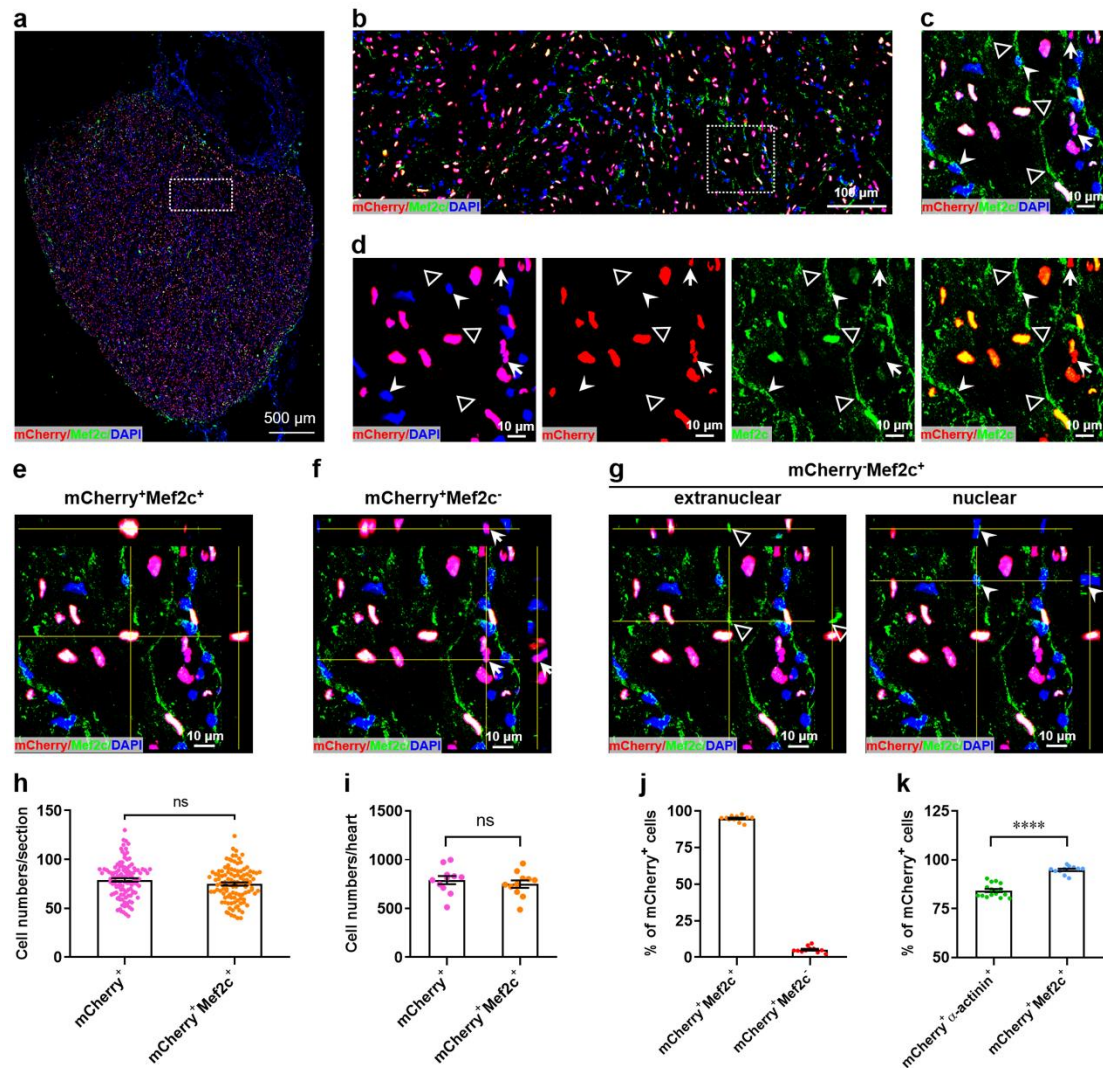

**Supplementary Figure 2. Accuracy evaluation of nuclear staining of cardiomyocytes in adult *X. tropicalis*.** **a** Immunostaining for mCherry (red) and Mef2c (green) expression in a whole cardiac section from the adult heart of F1 *Tg(mlc2:H2C)* frog. DAPI was used as a nuclear stain (blue). **b** Magnified immunostaining image of the non-apical region white boxed in the whole cardiac section. **c** Magnified immunostaining image of the white boxed region in figure B showing that most mCherry-positive nuclei are co-labeled by Mef2c (mCherry<sup>+</sup>Mef2c<sup>+</sup>). Arrow denotes the mCherry<sup>+</sup>Mef2c<sup>-</sup> cells. Arrowhead denotes mCherry<sup>-</sup>Mef2c<sup>+</sup> cells with intranuclear expression of Mef2c. Triangle denotes mCherry<sup>-</sup>Mef2c<sup>+</sup> cells with extranuclear expression of Mef2c. **d** Single- and double-channel fluorescence images of figure c for mCherry/DAPI (pink), mCherry (red), Mef2c (green), and mCherry/Mef2c (yellow) expression. **e-g** Representative Z-stack confocal images of mCherry<sup>+</sup>Mef2c<sup>+</sup> (e), mCherry<sup>+</sup>Mef2c<sup>-</sup> (f), and mCherry<sup>-</sup>Mef2c<sup>+</sup> (g) cells in figure c. **h** and **i** Quantification of mCherry<sup>+</sup> and mCherry<sup>+</sup>Mef2c<sup>+</sup> cell numbers in adult hearts of F1 *Tg(mlc2:H2C)* frogs. Data are presented as mean ± SEM ( $n = \sim 150$  sections from 11 hearts for h,  $n = 11$  hearts for i). Ns, no significant difference (Student's *t* test). **j** Quantification of mCherry<sup>+</sup>Mef2c<sup>+</sup> and mCherry<sup>+</sup>Mef2c<sup>-</sup> cells percentages in adult hearts of F1 *Tg(mlc2:H2C)* frogs. Data are presented as mean ± SEM ( $n = 11$  hearts). **k** Quantification and comparison of mCherry<sup>+</sup> $\alpha$ -actinin<sup>+</sup> and mCherry<sup>+</sup>Mef2c<sup>+</sup> cells percentages in adult hearts of F1 *Tg(mlc2:H2C)* frogs. Data are presented as mean ± SEM ( $n = 16$  and 11 hearts, respectively). \*\*\*\* $p < 0.0001$  (Student's *t* test).

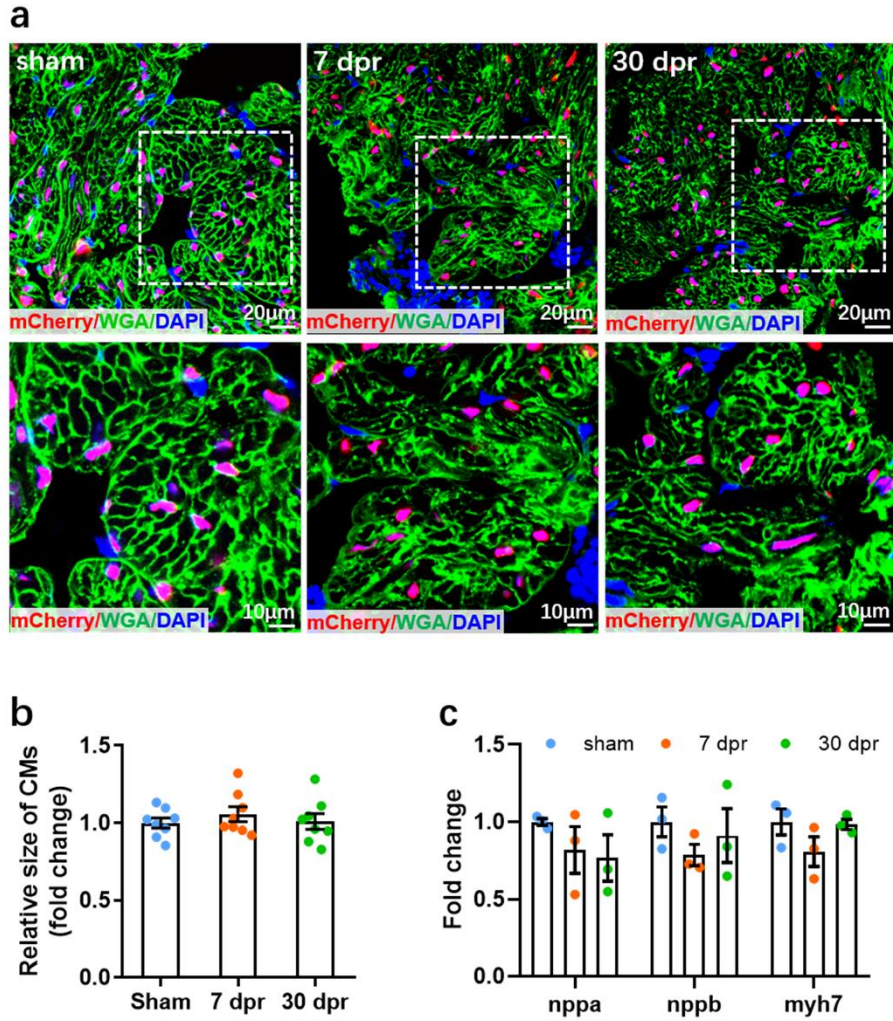

**Supplementary Figure 3. Evaluation of cardiomyocyte hypertrophy in adult reporter line during heart regeneration.** **a** and **b** Representative WGA staining images (**a**) and quantification (**b**) of cardiomyocyte size located in the ventricular apex at the indicated time points. Data are presented as mean  $\pm$  SEM ( $n = 8$  hearts, one-way ANOVA test). **c** qPCR validation of hypertrophic markers including *nppa*, *nppb*, and *myh7* in ventricles at the indicated time points. Data are presented as mean  $\pm$  SEM ( $n = 3$  hearts, two-way ANOVA test).

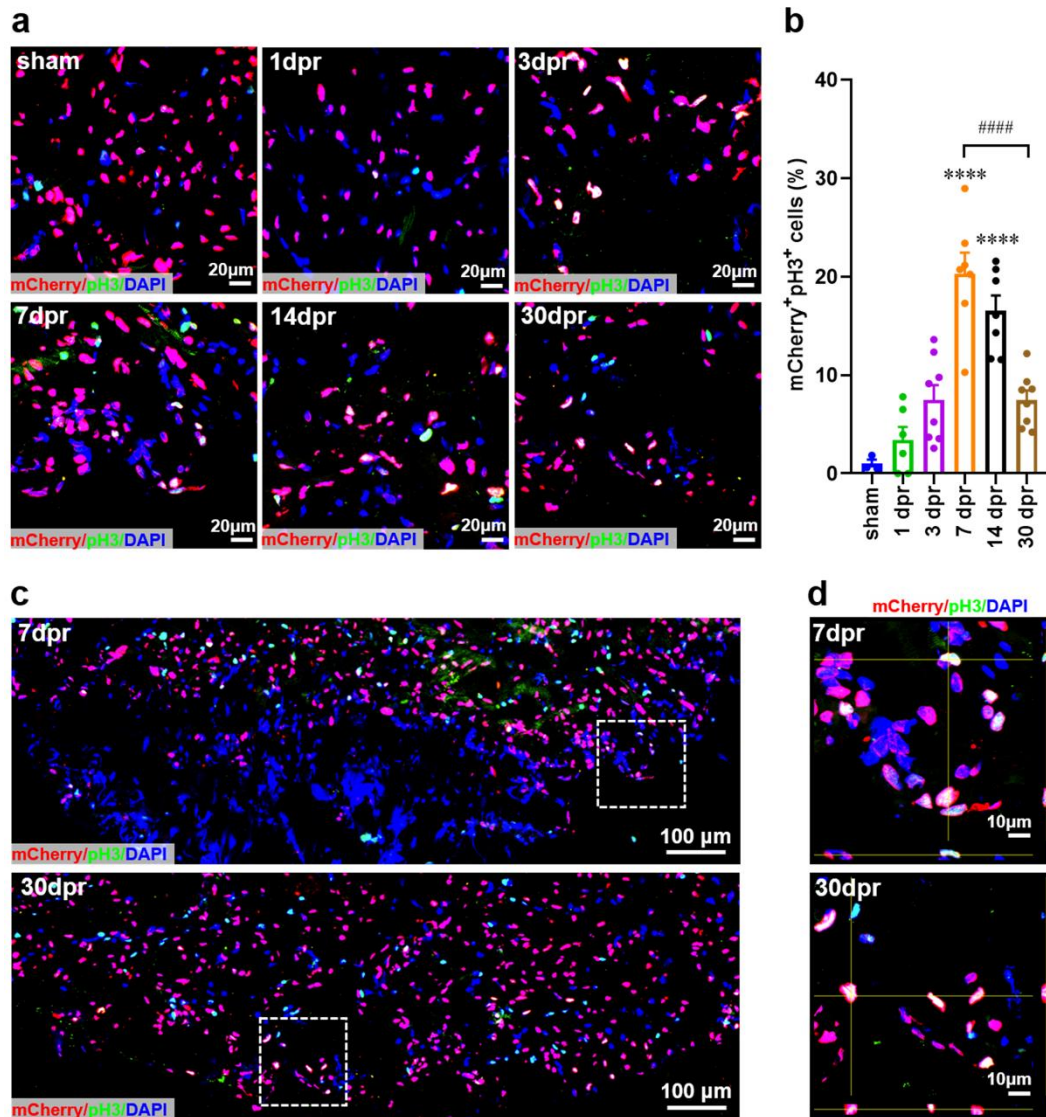

**Supplementary Figure 4. Determination of cardiomyocyte proliferation in adult *Tg(mlc2:H2C)* transgenic *X. tropicalis* line using antibody against pH3 (CST, #3377).** **a** Immunostaining for mCherry (red) and pH3 (green, antibody from CST, #3377) expression in the apex of adult hearts from F1 *Tg(mlc2:H2C)* frogs at the indicated time points after resection. DAPI was used as a nuclear stain (blue). **b** Quantification of mCherry<sup>+</sup>pH3<sup>+</sup> cells in ventricular apex during heart regeneration within 30 days. Data are presented as mean ± SEM ( $n = 3$  hearts for sham, 5 ~ 8 hearts for injured groups). \*\*\*\* $p < 0.0001$  versus sham, ##### $p < 0.0001$  (one-way ANOVA test). **c** Representative images of mCherry<sup>+</sup>pH3<sup>+</sup> cells in the whole apical regions at 7 and 30 dpr. **d** Magnified Z-stack confocal images of mCherry<sup>+</sup>pH3<sup>+</sup> cells indicated by dashed line in Figure c are shown.

**Supplementary Table 1. Primer sequences for real-time PCR analysis in *Xenopus tropicalis*.**

| Genes         | Primer sequence (5'-3') |                        |
|---------------|-------------------------|------------------------|
|               | Forward primer          | Reverse primer         |
| <i>nppa</i>   | CAGTCCTGCATACAGCTC      | AAGCATCGGCAACATCA      |
| <i>nppb</i>   | CAGCCCACCCAGTTATGGA     | ATTTGTAGCATCTGCGTCC    |
| <i>myh7</i>   | TTCATTGACTTCGGCATGGA    | AATGAAGTGTCTGTTGCCTT   |
| <i>tbx5</i>   | GGGTCAGTAGCACCTCC       | TCCAGAACGATAGTAAGGGT   |
| <i>tbx20</i>  | GCTATGGGACAAATTCCATG    | TTTTCCAGCCACCAACC      |
| <i>tnni3</i>  | TGTCCGGCTTGTCCCTA       | ACTTTAGCCTCCATGTCTG    |
| <i>tnnt2</i>  | AAAAGATCTTACTGAACTGC    | G TTCAGCTCGTCTCTTC     |
| <i>hand1</i>  | AAGACCCTAAGACTAGCCAC    | CCGCACCCCAATATCCTTC    |
| <i>hand2</i>  | ACCTGCTGGCCAAGGAC       | CCAGACATGTTGCGGCCAA    |
| <i>bmp4</i>   | TAACACCGTGAGGAGCTTC     | ATAGAGTCTTAGTTCTGCT    |
| <i>fbrsl1</i> | AAAGAAGGACCTTTTGCT      | CAATGTCTTTGGAGCGAT     |
| <i>Odc</i>    | AGGCCACACTGGCAACTCA     | TGCGCTCAGTTCTGGTACTTCA |

## Supplementary video legends

**Supplementary Video 1. Characterization of cardiac expression of mCherry in *Tg(mlc2:H2C)* tadpole.** Beating heart of *Tg(mlc2:H2C)* tadpole was captured by Leica M205FA stereo fluorescence microscope in bright- and epifluorescence-field vision. Red fluorescence indicates mCherry expression in heart. Scale bar, 250  $\mu\text{m}$ .

**Supplementary Video 2. Characterization of nuclear expression of mCherry in cardiomyocytes of *Tg(mlc2:H2C)* tadpole.** Beating heart of *Tg(mlc2:H2C)* tadpole was captured by the SpinSR10 spinning disk confocal super resolution microscope (Olympus). Red fluorescence indicates nuclear expression of mCherry in cardiomyocytes. Scale bar, 100  $\mu\text{m}$ .
